# Supplementary material
Source: PubMed Central journal article supplement (PMC3169848)

1  
2  
3 **Results for Supplementary Figure S1: Comparing EEG activity on the LE's to the PRE evening**  
4 **for each light condition separately, EEG activity on the LE evenings was significantly lower in**  
5 **some frequency bins in the EEG beta range, (e.g. between 15.75 and 16.25, 20.25 to 20.75, 21.75-**  
6 **24.25 Hz, and 24.75 to 25.25 Hz), in the group exposed to blue-enriched polychromatic light**  
7 **( $p < 0.05$ ; one-way rANOVA;  $F_{4,16} > 3.0$ ;  $p < 0.05$ ; (Figure S1)**  
8  
9

10 **Figure S1:**

11 Relative EEG power density for each LE (% of PRE LE evening at the same clock time) and each light  
12 group; mean + SEM; n=5 per light group. Left panel: blue-enriched polychromatic white light group  
13 (black circles); right panel: white polychromatic light group (white circles). Open triangles indicate the  
14 frequency bins in which a significant difference between the respective LE and the PRE condition was  
15 found (one-way rANOVA  $p < 0.05$ ).  
16  
17  
18  
19  
20  
21  
22  
23  
24  
25  
26  
27  
28  
29  
30  
31  
32  
33  
34  
35  
36  
37  
38  
39  
40  
41  
42  
43  
44  
45  
46  
47  
48  
49  
50  
51  
52  
53  
54  
55  
56  
57  
58  
59  
60  
61  
62  
63  
64  
65

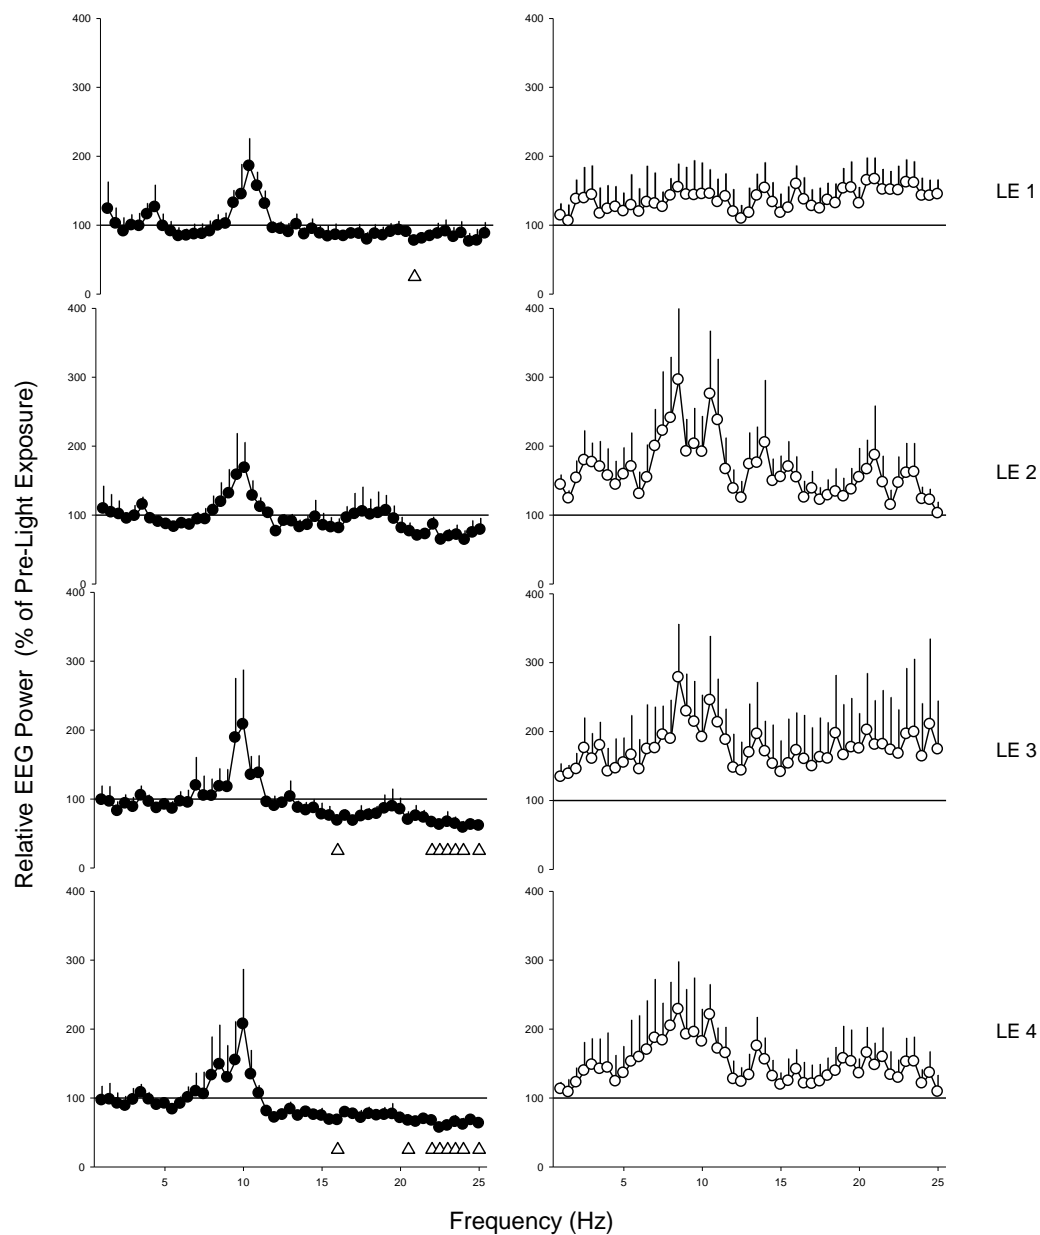

Supplement: NIHMS301423-supplement-01.pdf [file NIHMS301423-supplement-01.pdf]
